# Supplementary material for: Al2O3coated metal sulfides: one-pot synthesis and enhanced lithium storage stability via localized in situ conversion reactions
Source: Royal Society of Chemistry journal article supplement (doi:10.1039/c6dt04467k), 2016-12-20
Supplement: c6dt04467k1.pdf [file c6dt04467k1.pdf]

## Supporting Information

### **Al<sub>2</sub>O<sub>3</sub> coated metal sulfides: One-pot synthesis and enhanced lithium storage stability via localized In-situ conversion reactions**

*Yuanyuan Liu, <sup>a</sup> JiantaoZai, <sup>\*a</sup> Xiaomin Li, <sup>a</sup> Zi-Feng Ma <sup>a</sup> and Xuefeng Qian<sup>\*a</sup>*

*<sup>a</sup>Shanghai Electrochemical Energy Devices Research Center, School of Chemistry and Chemical Engineering and State Key Laboratory of Metal Matrix Composites,*

*Shanghai Jiao Tong University, Shanghai, 200240, P. R. China*

\*Corresponding authors: Tel: +86-21-34202642, Fax: +86-21-54741297,

E-mail: xfqian@sjtu.edu.cn; zaijiantao@sjtu.edu.cn

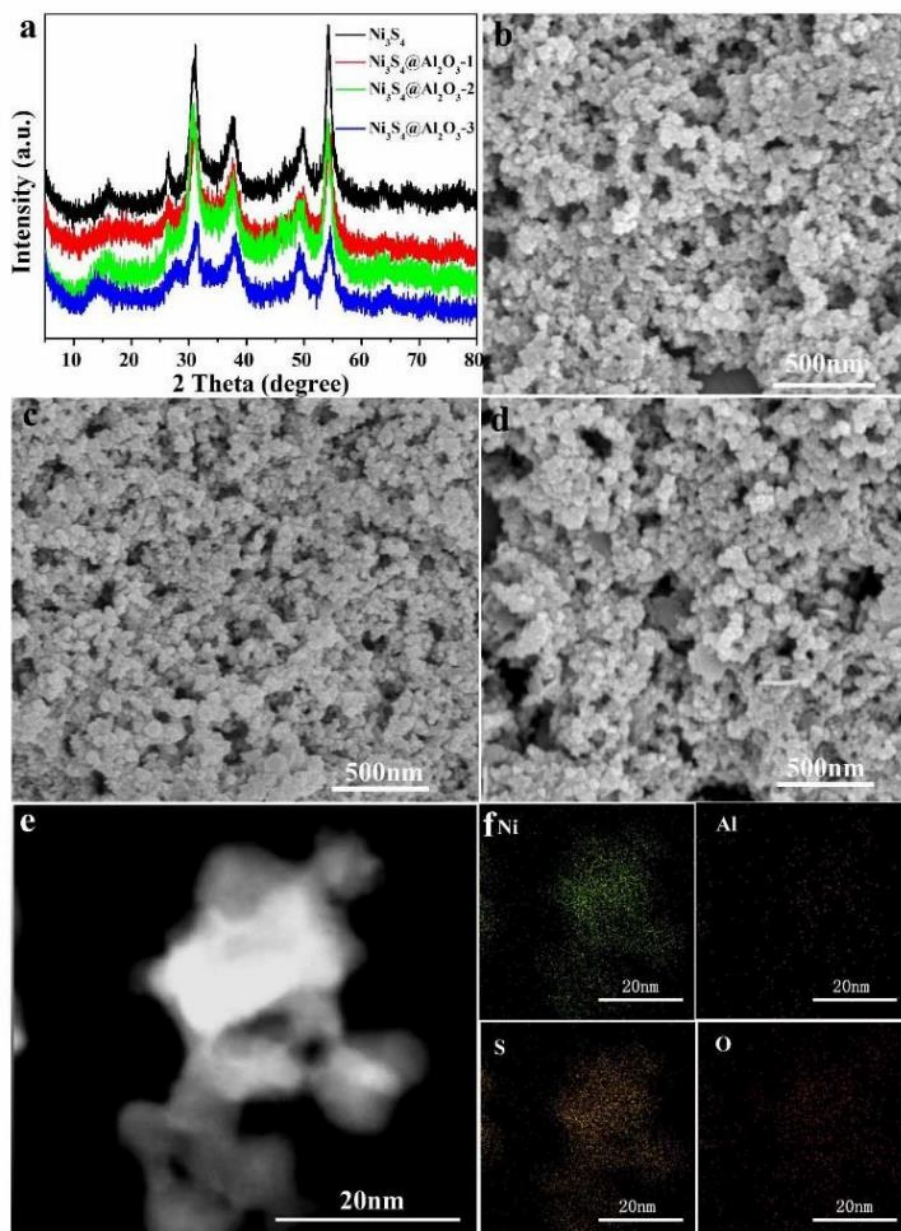

**Figure S1.** (a) XRD patterns of  $\text{Ni}_3\text{S}_4$  and  $\text{Ni}_3\text{S}_4@Al_2O_3$  composites, SEM of (b)  $\text{Ni}_3\text{S}_4$ , (c)  $\text{Ni}_3\text{S}_4@Al_2O_3$ -1, (d)  $\text{Ni}_3\text{S}_4@Al_2O_3$ -3. (e) HAADF-STEM image of  $\text{Ni}_3\text{S}_4@Al_2O_3$ -2 and (f) corresponding elemental mappings.

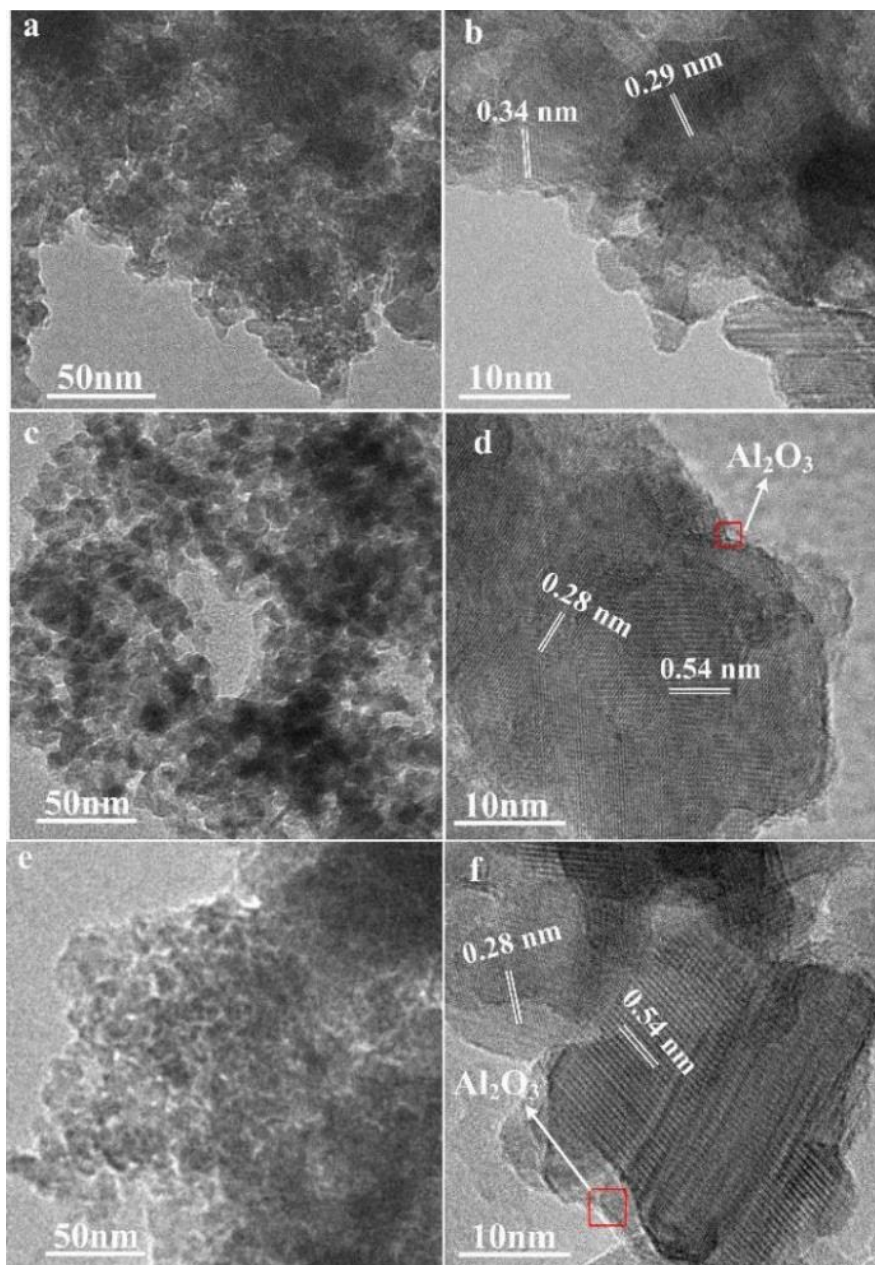

**Figure S2.** TEM image of as-prepared (a) Ni<sub>3</sub>S<sub>4</sub>, (c) Ni<sub>3</sub>S<sub>4</sub>@Al<sub>2</sub>O<sub>3</sub>-1, (e) Ni<sub>3</sub>S<sub>4</sub>@Al<sub>2</sub>O<sub>3</sub>-3 and HRTEM image of (b) Ni<sub>3</sub>S<sub>4</sub>, (d) Ni<sub>3</sub>S<sub>4</sub>@Al<sub>2</sub>O<sub>3</sub>-1, (f) Ni<sub>3</sub>S<sub>4</sub>@Al<sub>2</sub>O<sub>3</sub>-3.

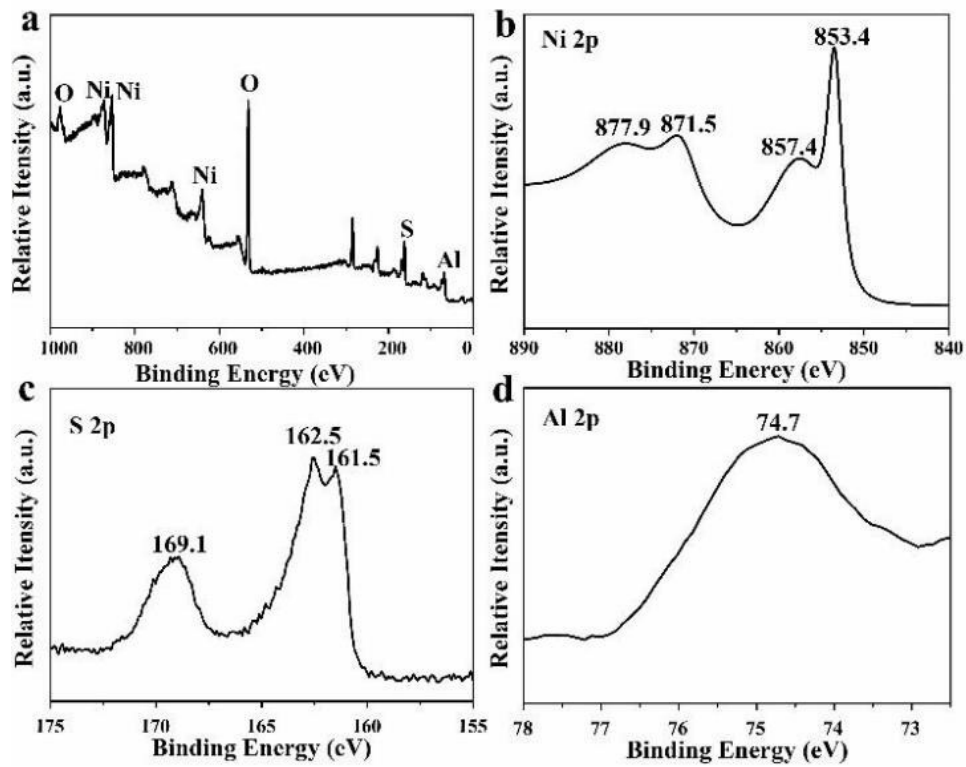

**Figure S3.** (a) XPS spectrum of  $\text{Ni}_3\text{S}_4@\text{Al}_2\text{O}_3-2$ , high-resolution spectra of (b) Ni 2p, (c) S 2p and (d) Al 2p, respectively.

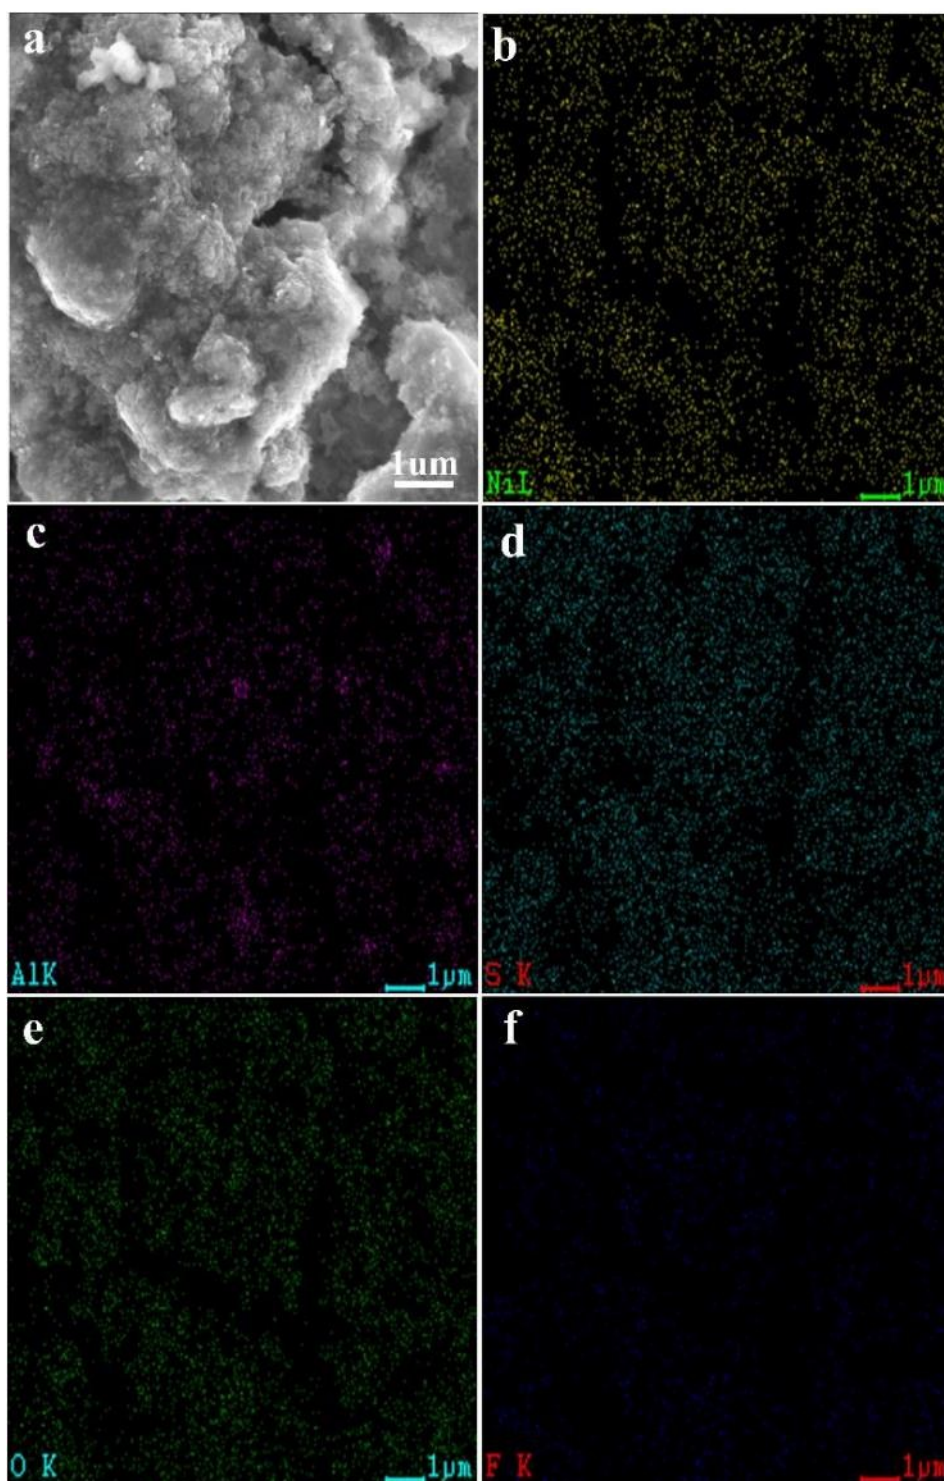

**Figure S4.** FE-SEM images (a) and corresponding elemental mapping of Ni (b), Al (c), S (d), O (e) and F (e) image of  $\text{Ni}_3\text{S}_4@\text{Al}_2\text{O}_3\text{-2}$  nanocomposite electrode after being discharged/charged for 50 cycles at the current density of  $500\text{mA g}^{-1}$  with the SEI film being removed.

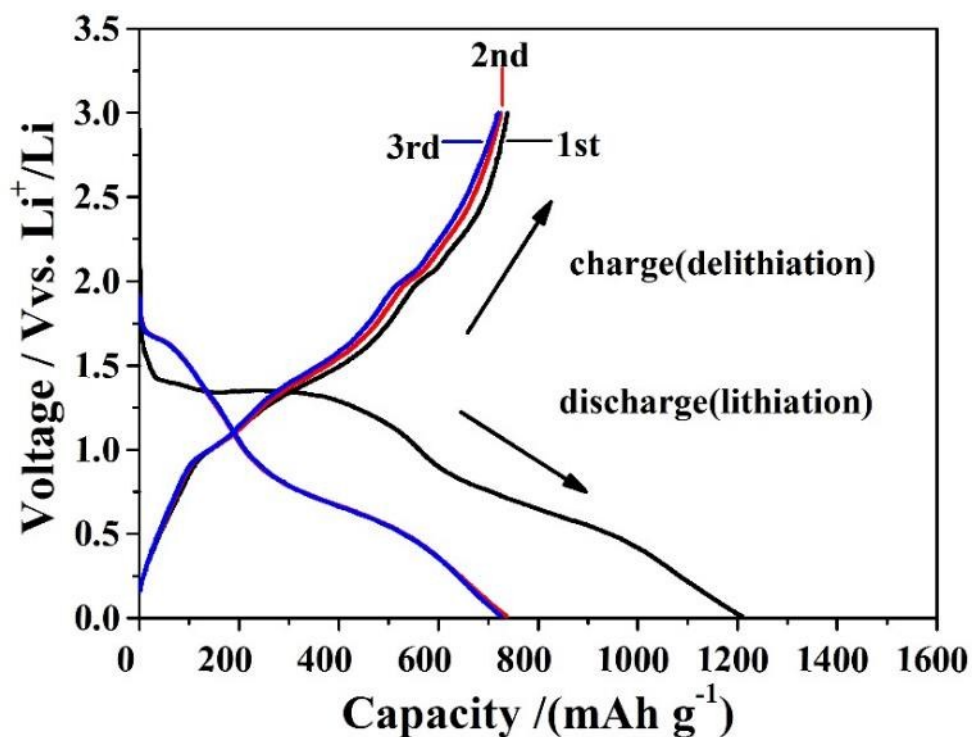

**Figure S5.** Charge/discharge voltage profiles (vs  $\text{Li}^+/\text{Li}$ ) of the initial 3 cycles of  $\text{Ni}_3\text{S}_4@\text{Al}_2\text{O}_3-2$  at  $500 \text{ mA g}^{-1}$ .

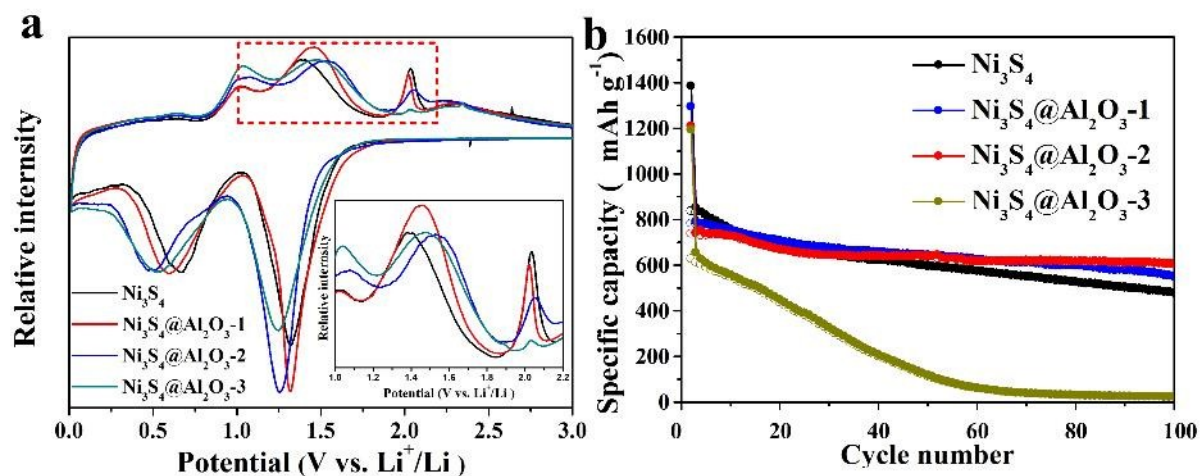

**Figure S6.** The 1<sup>st</sup> CV curves (a) and cycle performances (at  $500 \text{ mA g}^{-1}$ , b) of  $\text{Ni}_3\text{S}_4$  and  $\text{Ni}_3\text{S}_4@\text{Al}_2\text{O}_3$  between 0.01 V and 3.00 V.

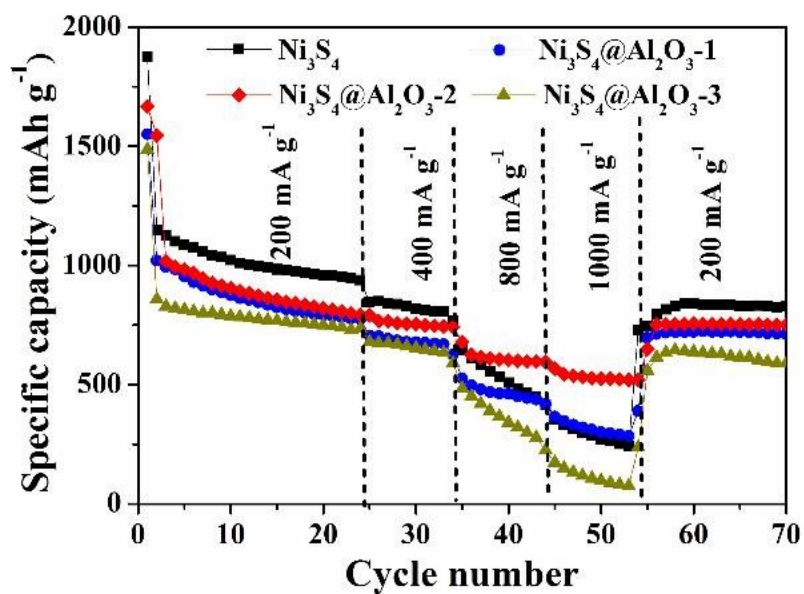

**Figure S7.** Different rate capacities of  $\text{Ni}_3\text{S}_4$  and  $\text{Ni}_3\text{S}_4@\text{Al}_2\text{O}_3$  anodes in the range of 200-1000  $\text{mA g}^{-1}$ .

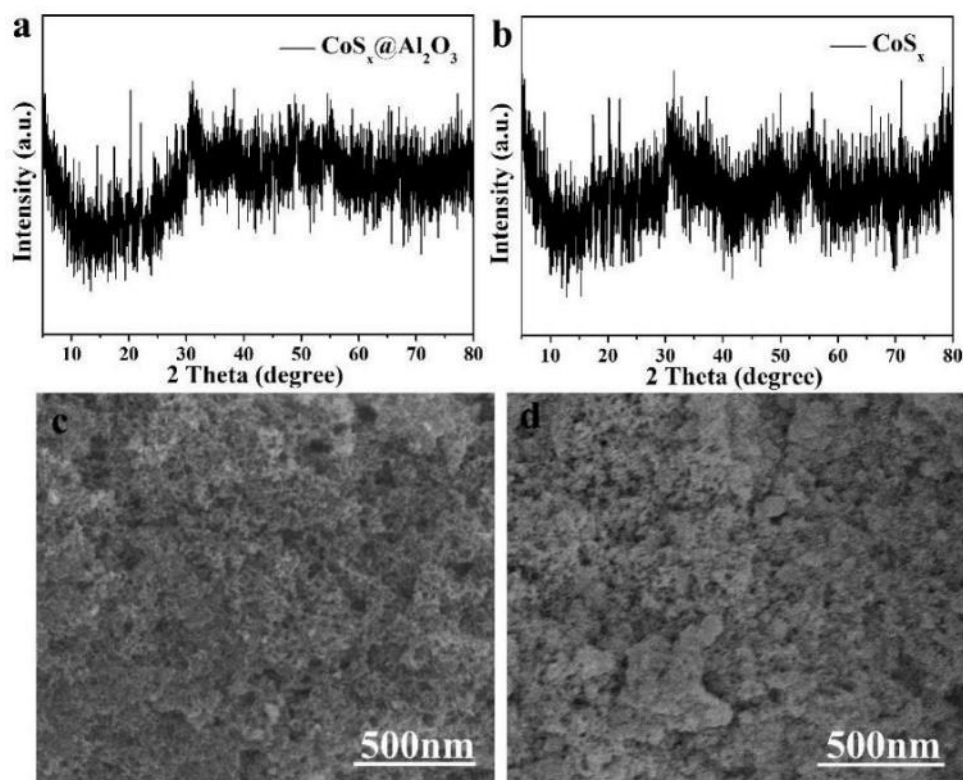

**Figure S8.** XRD patterns of (a)  $\text{CoS}_x@\text{Al}_2\text{O}_3$  composites, (b)  $\text{CoS}_x$ , and corresponding SEM of (c)  $\text{CoS}_x@\text{Al}_2\text{O}_3$  composites and (d)  $\text{CoS}_x$ .

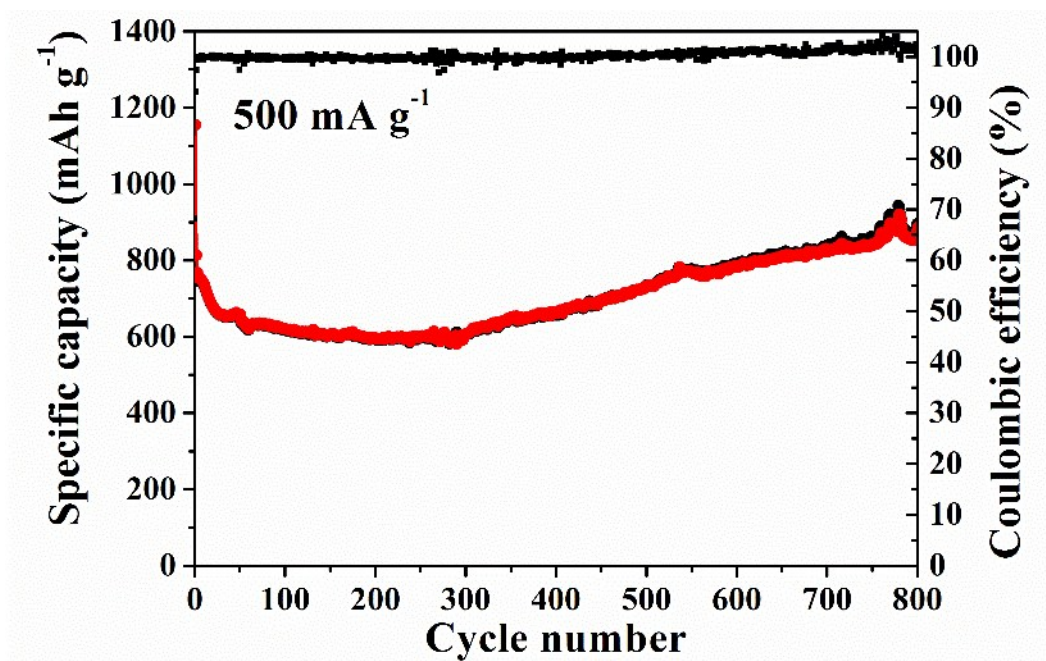

**Figure S9.** Cycle performances of  $\text{Ni}_3\text{S}_4@\text{Al}_2\text{O}_3$  at  $500 \text{ mA g}^{-1}$  between 0.01 V and 3.00 V (vs  $\text{Li}^+/\text{Li}$ ).
